# Supplementary material for: Effects of Cooking Methods on Caffeoylquinic Acids and Radical Scavenging Activity of Sweet Potato
Source: MDPI journal article supplement (doi:10.3390/foods13071101), 2024-04-03
Supplement: s1 [file s1]

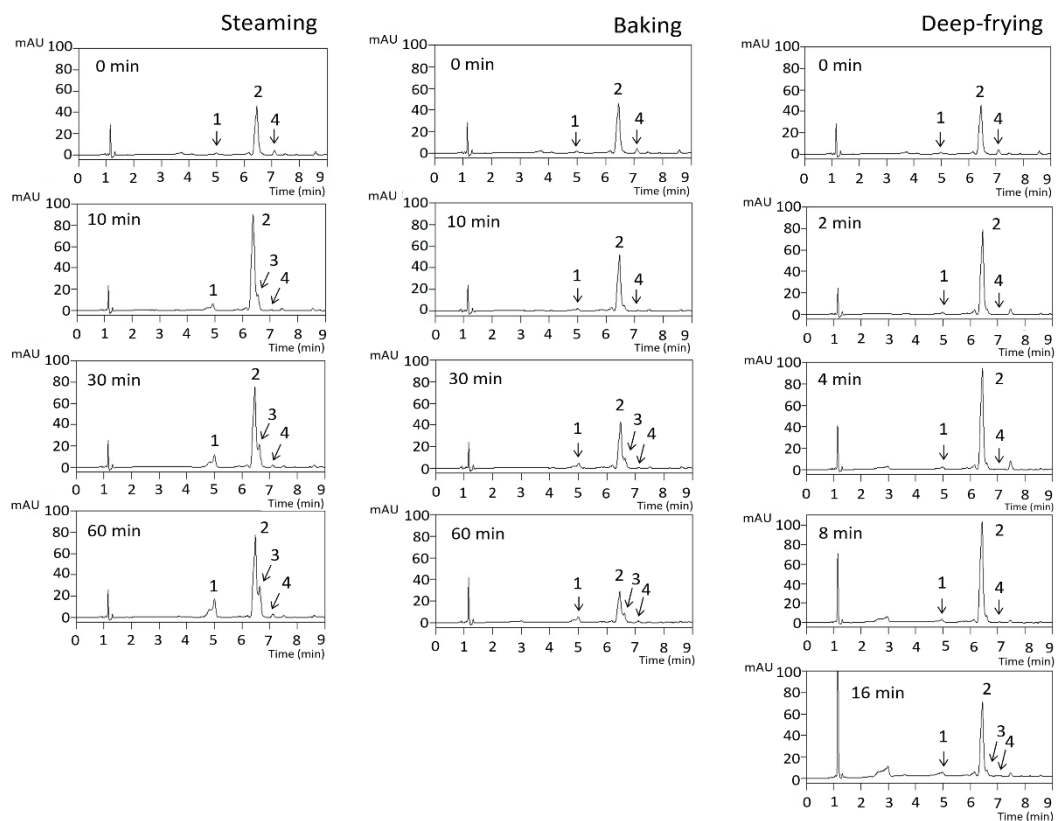

Figure S1 (Supplementary materials). HPLC patterns of monoCQAs and CA in the raw, steaming, deep-frying, and baking treatment roots. Peak 1: 3-CQA, peak 2: 5-CQA, Peak 3: 4-CQA, peak 4: CA.

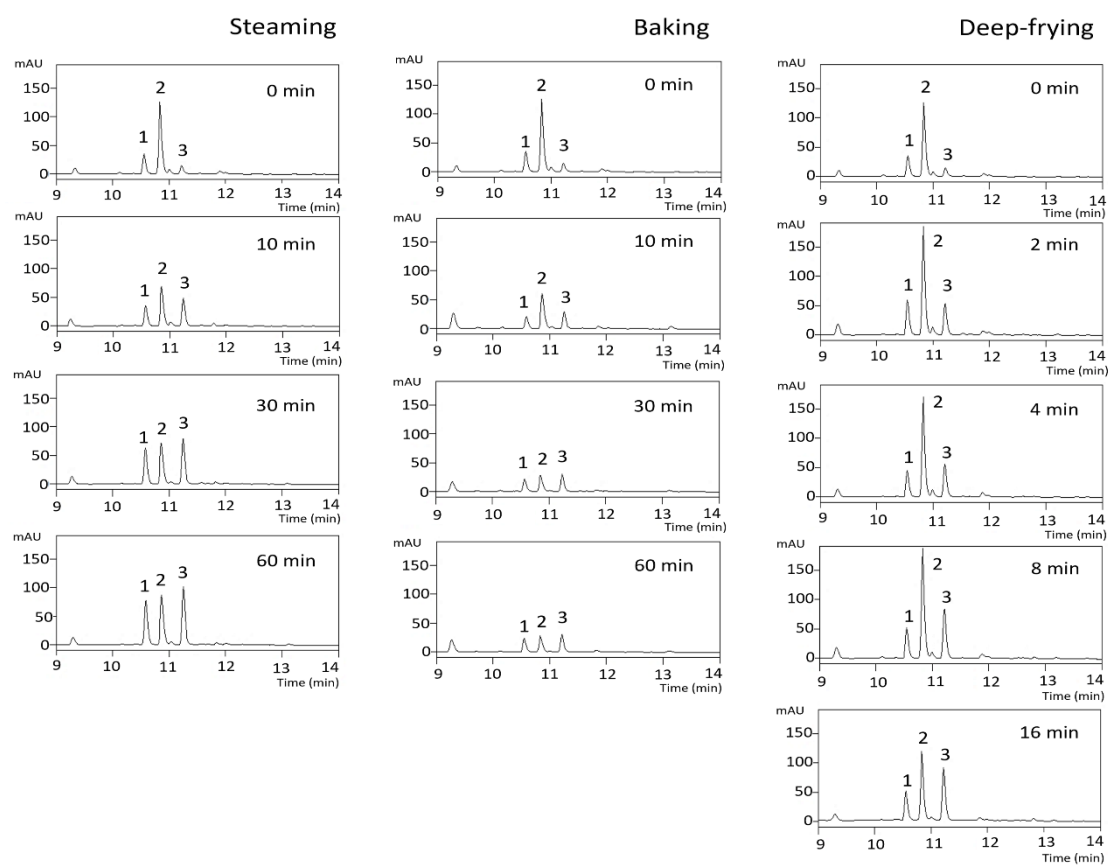

Figure S2 (Supplementary materials). HPLC patterns of diCQAs in the raw, the steaming, deep-frying, and baking treatment roots. Peak 1: 3,4-CQA, peak 2: 3,5-CQA, peak 3: 4,5-CQA.
